# Supplementary material for: Measuring the iron content of dopaminergic neurons in substantia nigra with MRI relaxometry
Source: PubMed Central journal article supplement (PMC8363938; doi:10.1016/j.neuroimage.2021.118255), 2021-10-01
Supplement: mmc1.pdf [file mmc1.pdf]

# Measuring the iron content of dopaminergic neurons in substantia nigra with MRI relaxometry

## Supplementary Information

Malte Brammerloh,<sup>1,2,3,\*</sup> Markus Morawski,<sup>4</sup> Isabel Friedrich,<sup>4</sup> Tilo Reinert,<sup>1,3</sup> Charlotte Lange,<sup>1,3</sup> Primož Pelicon,<sup>5</sup> Primož Vavpetič,<sup>5</sup> Steffen Jankuhn,<sup>3</sup> Carsten Jäger,<sup>1</sup> Anneke Alkemade,<sup>6</sup> Rawien Balesar,<sup>6</sup> Kerrin Pine,<sup>1</sup> Filippos Gavriilidis,<sup>1</sup> Robert Trampel,<sup>1</sup> Enrico Reimer,<sup>1</sup> Thomas Arendt,<sup>4</sup> Nikolaus Weiskopf,<sup>1,3,†</sup> and Evgeniya Kirilina<sup>1,7,†</sup>

<sup>1</sup>*Department of Neurophysics, Max Planck Institute for Human Cognitive and Brain Sciences, Stephanstr. 1a, 04103 Leipzig, Germany*

<sup>2</sup>*International Max Planck Research School on Neuroscience of Communication: Function, Structure, and Plasticity*

<sup>3</sup>*Felix Bloch Institute for Solid State Physics, Faculty of Physics and Earth Sciences, Leipzig University, Linnéstr. 5, 04103 Leipzig, Germany\**

<sup>4</sup>*Paul Flechsig Institute of Brain Research, University of Leipzig, Liebigstr. 19, 04103, Leipzig, Germany*

<sup>5</sup>*Jožef Stefan Institute, Jamova 39, SI-1000 Ljubljana, Slovenia*

<sup>6</sup>*Integrative Model-based Cognitive Neuroscience Research Unit, University of Amsterdam, Amsterdam, Nieuwe Achtergracht 129B, 1001 NK Amsterdam, The Netherlands*

<sup>7</sup>*Center for Cognitive Neuroscience Berlin, Free University Berlin, Habelschwerdter Allee 45, 14195, Berlin, Germany*



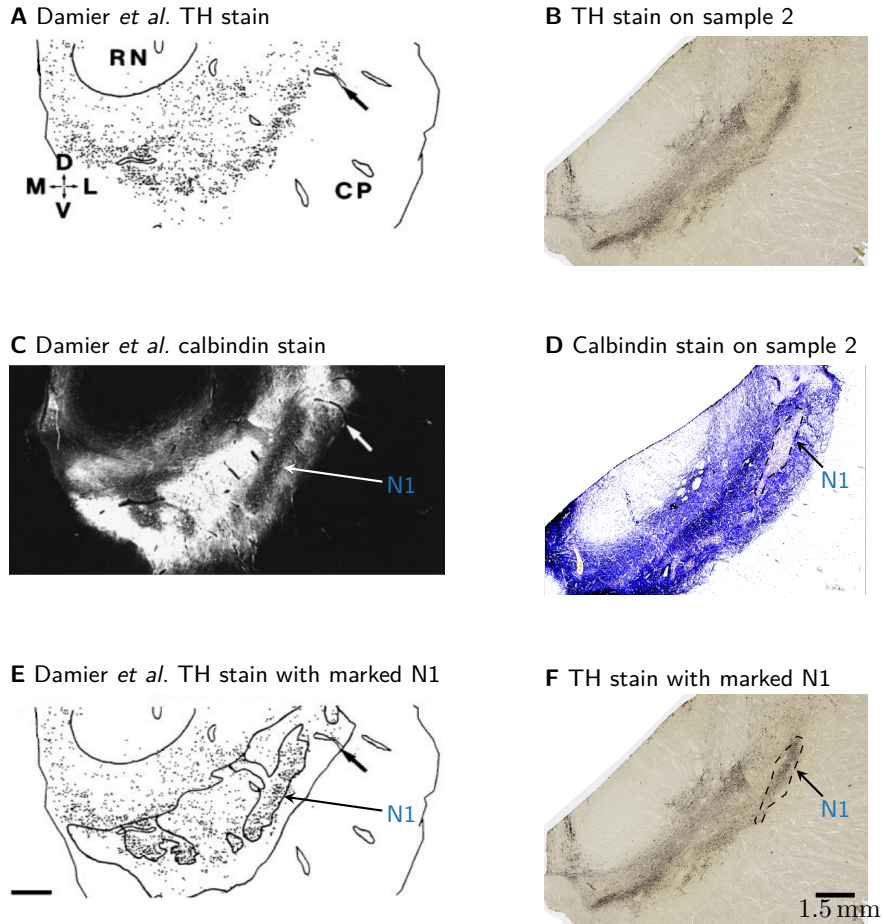

13

14 Figure S1. Nigrosome 1 (N1) definition following Damier *et al.* [3]. A: On sections stained for  
 15 tyrosine hydroxylase (TH), Damier *et al.* marked the locations of the somata of dopaminergic  
 16 neurons with black dots (A, C, and D adapted from [3]). B: A section from sample 2 of our study  
 17 stained for TH shows a stripe of high staining intensity with similar geometry as in A. C: On  
 18 sections stained for calbindin, Damier *et al.* identified nigrosomes as areas of low staining intensity.  
 19 N1, the largest nigrosome, was defined as a large structure extending along the medioventral-  
 20 dorsolateral axis. D: A section stained for calbindin from sample 2 shows an elongated structure  
 21 of low staining intensity as C, which we identified as N1. The N1 area is marked with a dashed  
 22 line. E: The nigrosome delineations of low calbindin immunoreaction (from C) are overlaid on  
 23 the TH-positive DN (from A). Inside the nigrosomes, Damier *et al.* found an increased density of  
 24 DN [3]. F: The calbindin-poor N1 region (from D) is overlaid on the section stained for TH (B),  
 25 showing high TH immunoreaction in N1 as in E. On A, anatomical directions are indicated as  
 26 medial (M), lateral (L), ventral (V), and dorsal (D).

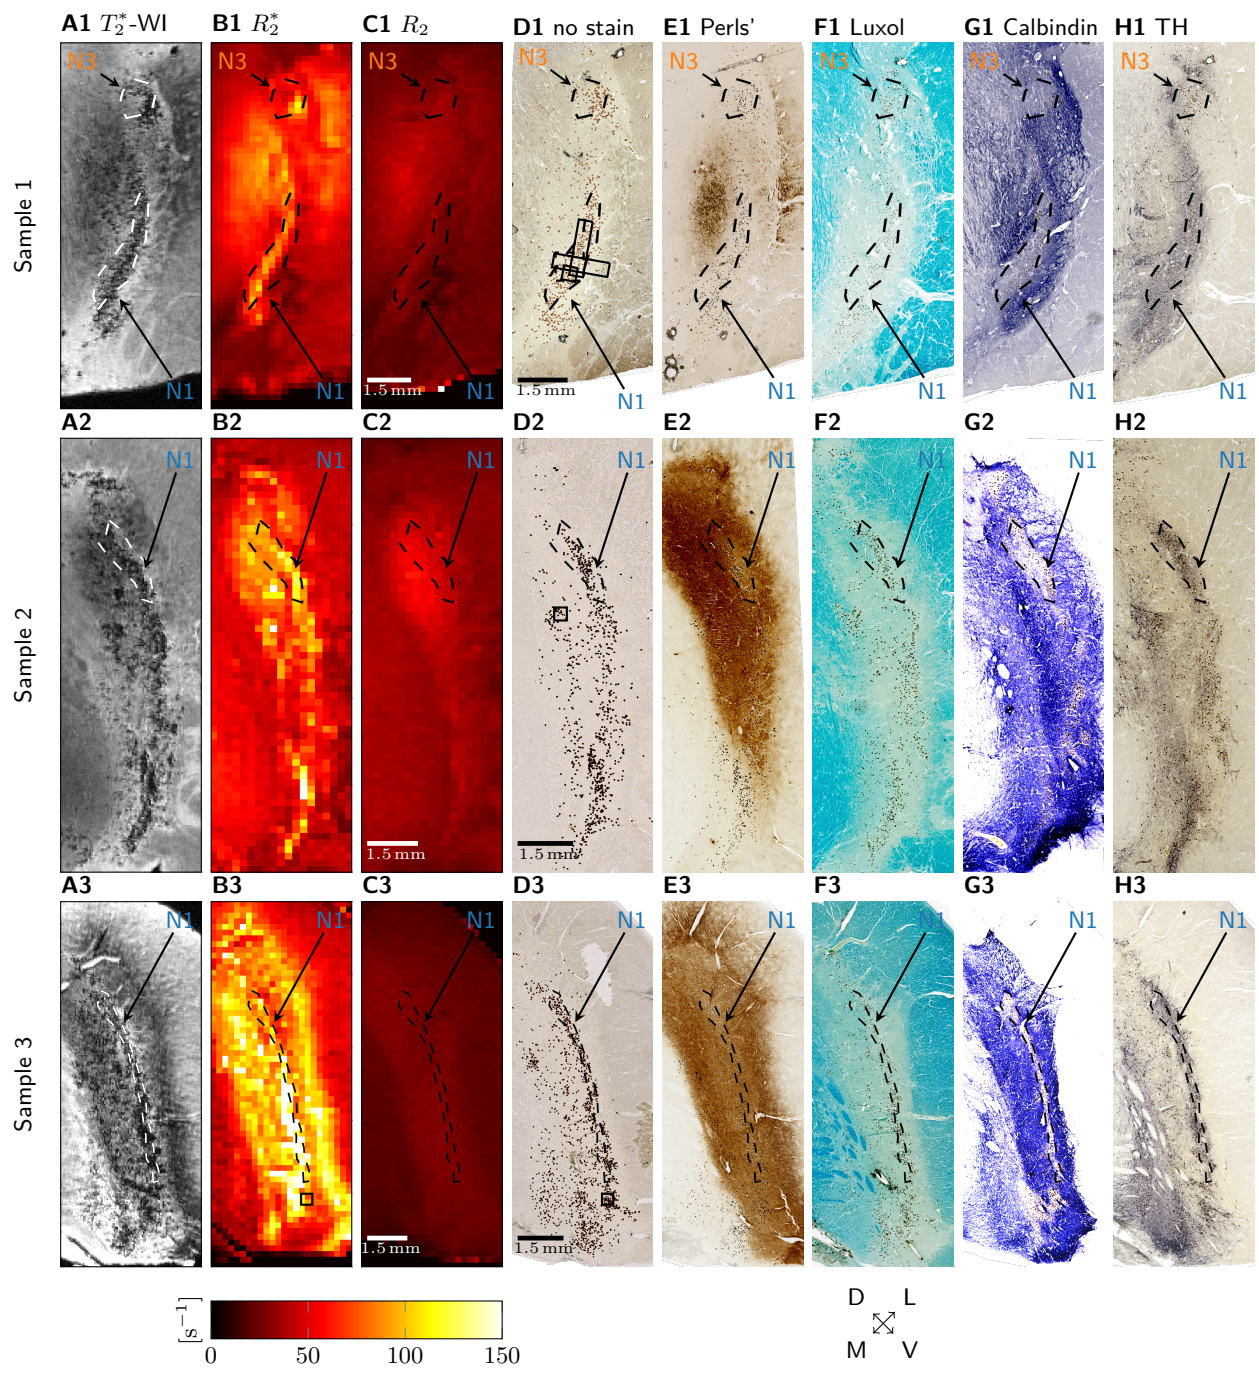

27

28

Figure S2. (Caption next page.)

29 Figure S2. MRI and histology data on the three analyzed samples are presented in three rows. A1-  
30 3:  $T_2^*$ -WI show granular hypointensities in the nigrosomes. B1-3: On quantitative  $R_2^*$  maps, areas  
31 with high relaxation rates resemble the hypointensities in  $T_2^*$ -WI. Videos of the  $R_2^*$  maps, available  
32 in the online version of this article, show the 3D structure of this area. C1-3: On quantitative  $R_2$   
33 maps, no nigrosome structure is visible. An area of slightly increased  $R_2$  resembles the shape of high  
34 Perls' staining intensity (E1-3). D1-3: Clusters of high neuromelanin density on unstained sections  
35 were co-localized with granular hypointensities in  $T_2^*$ -WI and hyperintensities on quantitative  $R_2^*$   
36 maps. (Each neuromelanin domain was marked with a brown dot for better visibility.) The PIXE  
37 measurement areas (Figs. 1, 3, S5) are indicated with black squares. In sample 1, the dashed  
38 and solid squares indicate measurements on two adjacent histological sections. E1, E2, E3: On  
39 sections stained with Perls' solution for iron, a high intersubject variability was observed. F1-3: On  
40 sections stained with Luxol for myelin, a low staining intensity was observed in the SN, including  
41 the nigrosome areas. G1-3: On sections stained for calbindin, an elongated structure of low staining  
42 intensity was identified as N1 and marked with a dashed line. For sample 1, a circular structure  
43 of low staining intensity was identified as N3 and marked with a dashed line as well. H1, H2, H3:  
44 On sections stained for tyrosine hydroxylase (TH), the regions of high staining intensity showed  
45 high spatial correspondence to the distribution on neuromelanin on the unstained sections (D1-3).  
46 In all images, the location of N1 is indicated with an arrow and a dashed line encompasses the N1  
47 area identified on the sections stained for calbindin. Anatomical directions are indicated as medial  
48 (M), lateral (L), ventral (V), and dorsal (D).

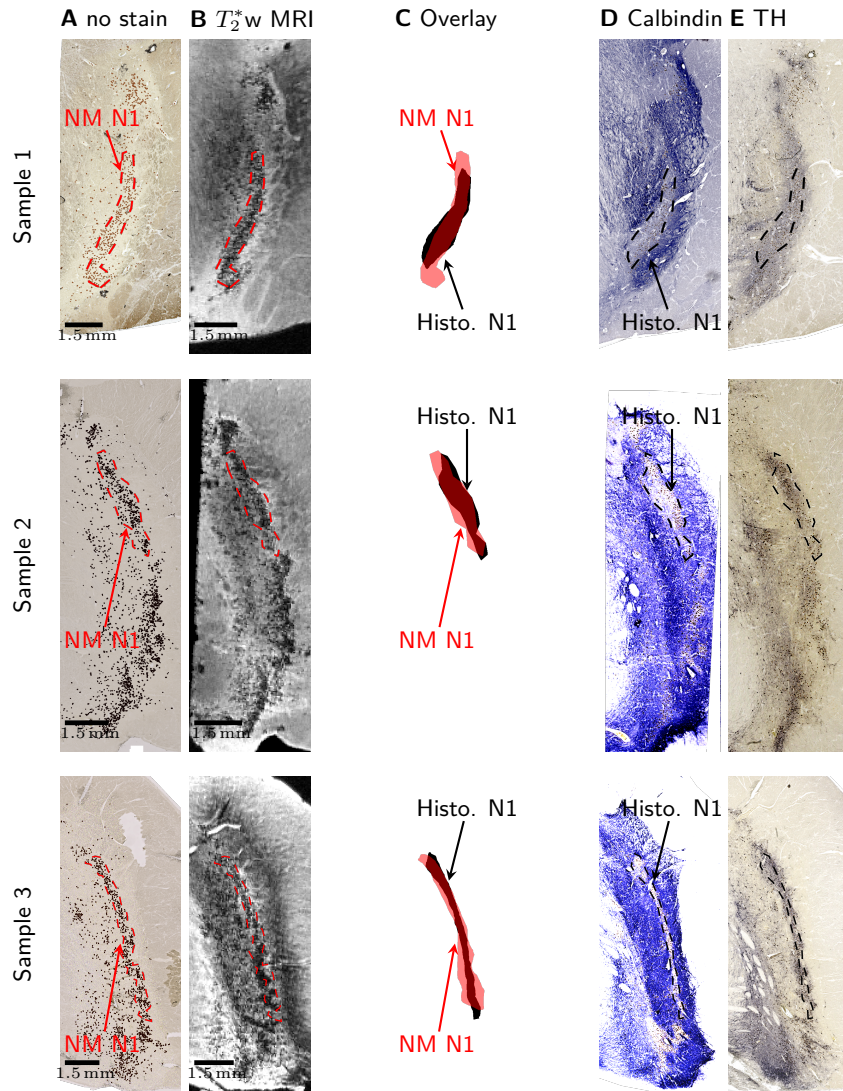

49

50 Figure S3. Neuromelanin-based N1 and histochemical N1 show high overlap in *post mortem* SN. A:  
 51 A stripe with high density of iron-rich neuromelanin (NM) domains was used to define NM-based  
 52 N1. B: At the location of the NM-based N1,  $T_2^*$ -WI shows a stripe of granular hypointensities,  
 53 caused by the high content of paramagnetic iron in NM. C: Overlaying the NM-based N1 with  
 54 the histochemical N1, the NM-based N1 covered  $(84 \pm 2)\%$  of the histochemically defined N1.  
 55 The intersection of the NM-based and histochemical N1 covered  $(66 \pm 5)\%$  of the NM-based N1's  
 56 area. Based on this high correspondence between the histochemical and NM-based N1 areas, we  
 57 identified N1 as a stripe of granular hypointensities on high-resolution  $T_2^*$ -WI on the sample that  
 58 was used in the tissue iron extraction experiment. D: The histochemical N1 was delineated as  
 59 an elongated stripe of low calbindin immunoreaction in the dorso-lateral SN with the geometry  
 60 described by Damier *et al.* [3]. E: A strong TH immunoreaction was seen in the histochemical N1.

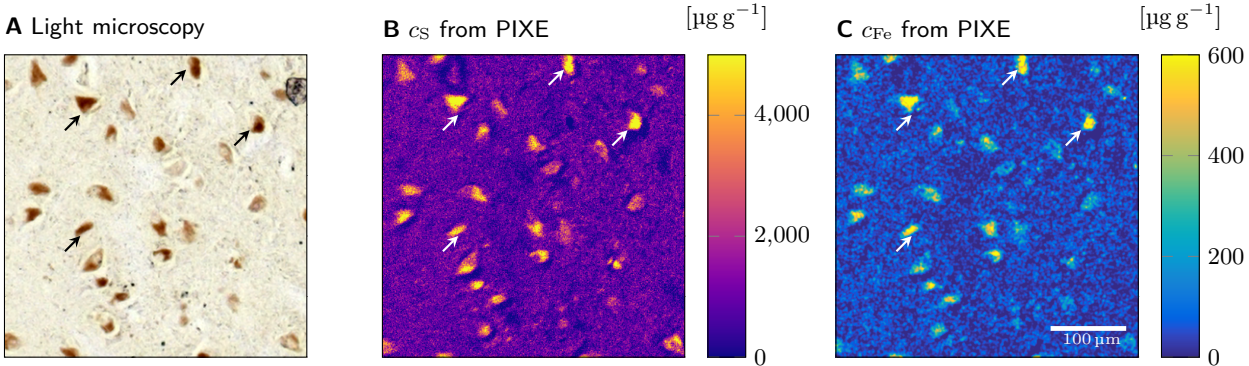

61

62

63 Figure S4. Co-registration of histological sections with PIXE data. A: Neuromelanin pigment is  
 64 seen on unstained tissue sections in light microscopy. B: On quantitative sulfur concentration maps  
 65 acquired with PIXE, the same neuromelanin clusters are seen as areas of increased concentration.  
 66 An affine registration was performed to register the optical microscopy to the sulfur map using  
 67 ANTs [4]. C: On quantitative iron concentration maps acquired with PIXE, the areas of elevated  
 68 iron concentration show a high correspondence to the areas of elevated sulfur concentration, i.e.  
 69 the location of neuromelanin domains in dopaminergic neurons. Four neuromelanin domains in  
 70 dopaminergic neurons with a strongly increased iron concentration are marked with arrows.

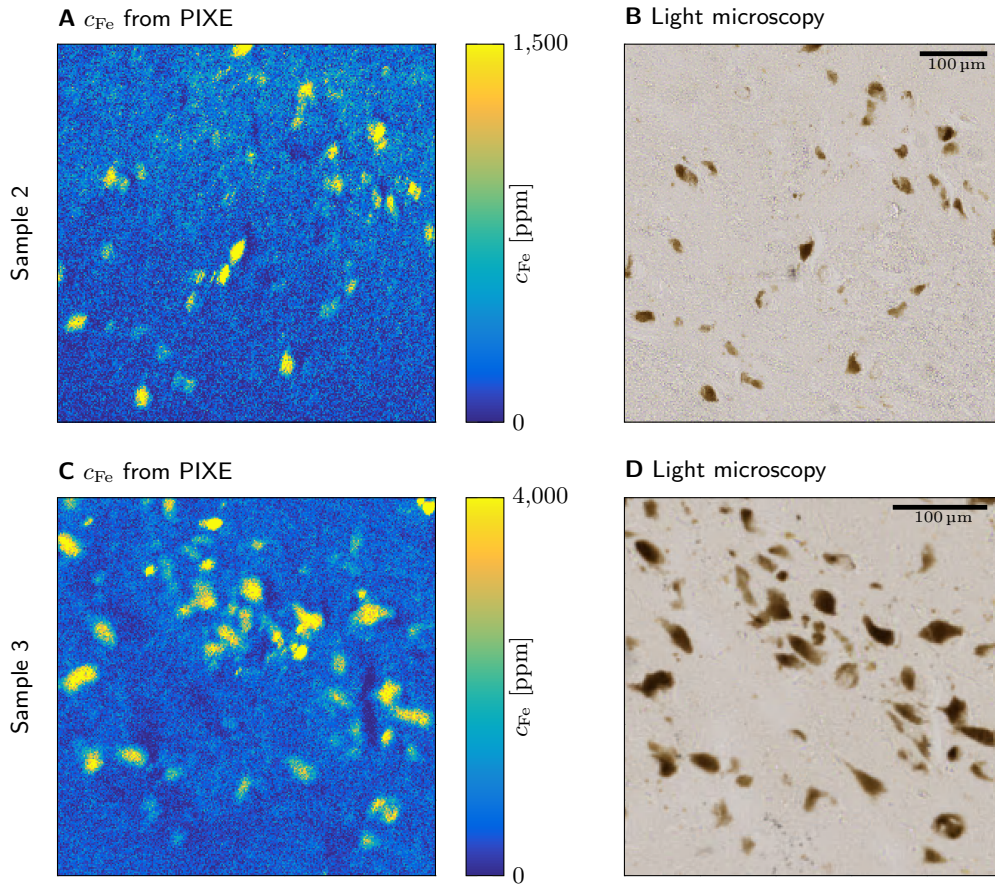

71

72 Figure S5. Iron concentration maps obtained with PIXE (A, C) together with light microscopy of  
 73 the measurement area (B, D) in samples 2 (top row) and 3 (bottom). In all samples, neurome-  
 74 lanin domains in DN showed increased iron concentrations, while most iron was found outside of  
 75 DN, probably associated with ferritin. In Table II, we report the average iron concentration in  
 76 neuromelanin-rich areas of DN as well as in the rest of the measurement area, the volume fraction  
 77 of neuromelanin-rich areas, and the iron fraction in DN. The depicted areas are indicated in Fig.  
 78 S2D2, D3.



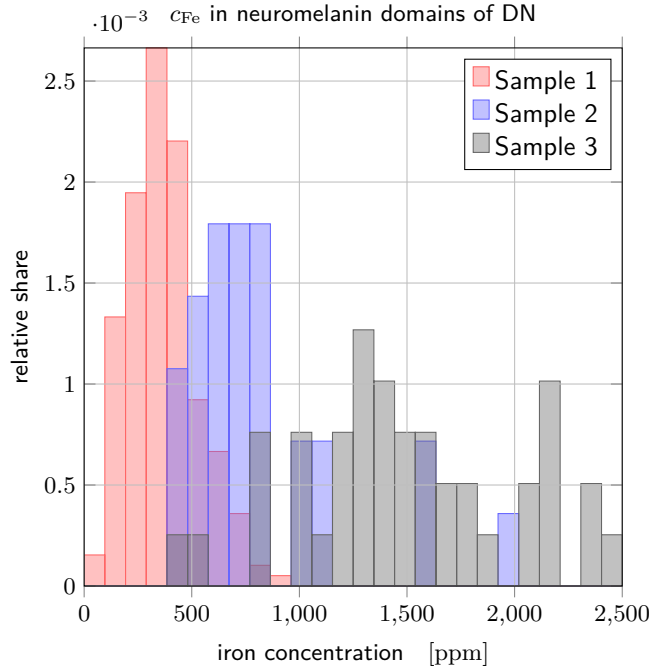

79

80 Figure S6. Histograms of iron concentrations in the neuromelanin of DN for all three samples. A  
 81 high intersubject variability of  $c_{\text{Fe,NM}}$  in DN is apparent: For sample 1, a mean and standard devi-  
 82 ation of  $(365 \pm 161)$  ppm was found, for sample 2  $(811 \pm 366)$  ppm, for sample 3  $(1495 \pm 499)$  ppm,  
 83 where the mean and standard deviation are calculated across neurons. These mean values are  
 84 different from the values reported in Table II, because here each DN was weighted equally, while in  
 85 the mean values in Table II the iron concentration is weighted with the DN's area in the microscopy  
 86 section.

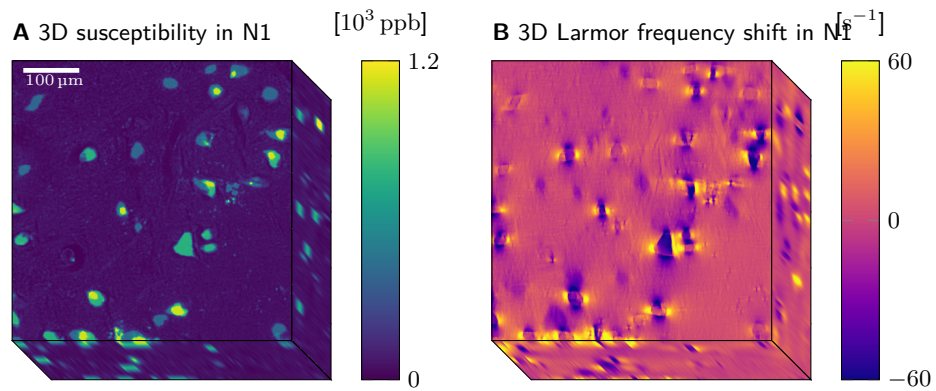

87

88 Figure S7. 3D susceptibility (A) and Larmor frequency shift maps (B) generated from the 3D  
 89 quantitative iron map (Fig. 3D). DN show increased susceptibility and induce strong Larmor  
 90 frequency perturbations in their vicinity.

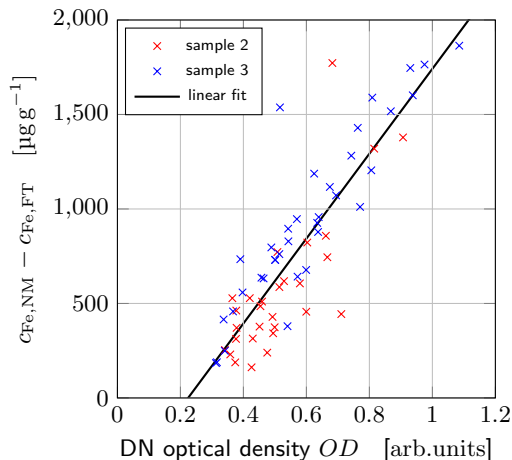

91

92 Figure S8. Optical density predicts iron concentration in DN measured with PIXE. The optical  
 93 density in DN in the PIXE measurement areas on unstained sections from samples 2 and 3 was  
 94 obtained from Eq. (10) with a  $GS_{bg} = 195$ . The  $OD$  data points represent optical densities  
 95 averaged over the area of individual DN in the PIXE measurement area. The iron concentration in  
 96 these DN was obtained by averaging the PIXE iron concentration maps over the area of individual  
 97 DN. Subsequently, the average iron concentration outside of the DN in the PIXE measurement  
 98 areas of samples 2 and 3 ( $c_{Fe,FT}$ , Table II) were subtracted from these iron concentrations in DN  
 99 from samples 2 and 3, respectively. Correlating optical densities and iron concentrations in DN  
 100 of samples 2 and 3, a Pearson correlation coefficient of  $r = 0.85$  was found, with an associated  
 101  $p = 8.32 \times 10^{-20}$ . Fitting the linear relation  $c_{Fe,NM} = A \cdot OD + B$  to the data of both samples  
 102 resulted in  $A = (2250 \pm 180) \mu\text{g g}^{-1} \text{arb.units}^{-1}$  and  $B = (-500 \pm 110) \mu\text{g g}^{-1}$ . This relation was  
 103 used to generate maps of the volume-averaged iron concentration in the neuromelanin of DN on  
 104 whole histological sections of samples 2 and 3 in Section 4.5 of the manuscript.

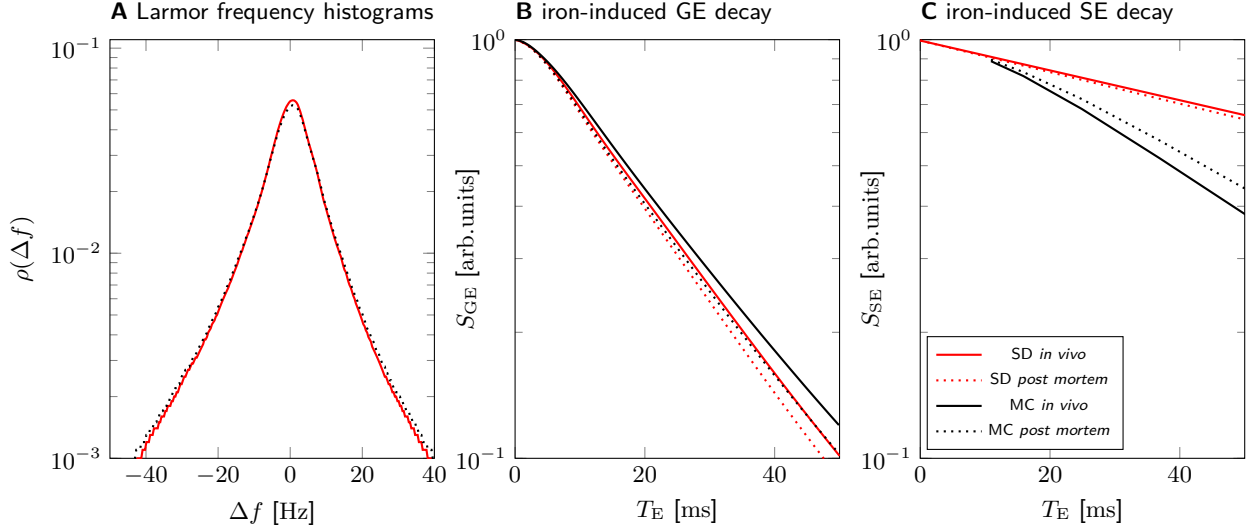

105

106 Figure S9. Modeling microscale relaxation in N1 of sample 1 in *in vivo* conditions. A: The increased  
 107 temperature *in vivo* (310 K) reduces the width of the Larmor frequency shift histogram (red)  
 108 slightly when compared to the *post mortem* histogram (black, dotted) (by  $1 - 293 \text{ K}/310 \text{ K} \approx 5\%$ ).  
 109 The susceptibility causes this because it is inversely proportional to the temperature according to  
 110 Curie's law. B: Despite the higher temperature and faster diffusion *in vivo* (solid lines), the GE  
 111 decays predicted with Monte Carlo (MC, black) and in static dephasing (SD, red) are similar to  
 112 the ones predicted for *post mortem* conditions (dotted). Hence, the relaxation regime is also *in*  
 113 *vivo* close to static dephasing. C: The SE decay predicted by MC in the *in vivo* condition is faster  
 114 (black, solid) than *post mortem* (black, dotted).
